# Supplementary material for: Extent of Spin Contamination Errors in DFT/Plane-wave Calculation of Surfaces: A Case of Au Atom Aggregation on a MgO Surface
Source: MDPI journal article supplement (doi:10.3390/molecules24030505), 2019-01-30
Supplement: s1 [file s1]

# Supplementary Materials for

## “Effect of spin contamination error and importance of open-shell structure for aggregation of Au atoms on a MgO surface”

Kohei Tada <sup>1,\*</sup>, Tomohiro Maruyama <sup>2</sup>, Hiroaki Koga <sup>3</sup>,  
Mitsutaka Okumura <sup>2,3</sup>, and Shingo Tanaka <sup>1</sup>

<sup>1</sup> Department of Energy and Environment, National Institute of Advanced Industrial Science and Technology (AIST), 1-8-31, Midorigaoka, Ikeda, Osaka, 563-8577, Japan

<sup>2</sup> Department of Chemistry, Graduate School of Science, Osaka University, 1-1, Machikaneyama, Toyonaka, Osaka, 560-0043, Japan

<sup>3</sup> Elements Strategy Initiative for Catalysts and Batteries (ESICB), Kyoto University, 1-30 Goryo Ohara, Nishikyo, Kyoto, Kyoto 615-8245, Japan

\* Corresponding Author

phone: +81-72-751-8566

fax: +81-72-751-9714

k-tada@aist.go.jp

# Contents

|             |      |
|-------------|------|
| • Table S1  | p. 3 |
| • Figure S1 | p. 4 |

## Captions for Table S1 and Figure S1

Table S1 The nearest neighbor atoms of the  $^2\text{Au}$  atom for all  $r$ .

Figure S1. Spin density distributions of the HS states. Isosurface values are  $0.004 \text{ e/Bohr}^3$ .

Table S1 The nearest neighbor atoms of the  $^2\text{Au}$  atom for all r.

| r     | LS            | HS            | BS            |
|-------|---------------|---------------|---------------|
| 0.000 | $^1\text{Au}$ | $^1\text{Au}$ | $^1\text{Au}$ |
| 0.025 | $^1\text{Au}$ | $^1\text{Au}$ | $^1\text{Au}$ |
| 0.050 | $^1\text{Au}$ | $^1\text{Au}$ | $^1\text{Au}$ |
| 0.075 | $^1\text{Au}$ | $^1\text{Au}$ | $^1\text{Au}$ |
| 0.100 | $^1\text{Au}$ | $^1\text{Au}$ | $^1\text{Au}$ |
| 0.125 | $^1\text{Au}$ | $^1\text{Au}$ | $^1\text{Au}$ |
| 0.150 | $^1\text{Au}$ | $^1\text{Au}$ | $^1\text{Au}$ |
| 0.175 | $^1\text{Mg}$ | $^1\text{Mg}$ | $^1\text{Mg}$ |
| 0.200 | $^2\text{O}$  | $^2\text{O}$  | $^2\text{O}$  |
| 0.225 | $^2\text{O}$  | $^2\text{O}$  | $^2\text{O}$  |
| 0.250 | $^2\text{O}$  | $^2\text{O}$  | $^2\text{O}$  |
| 0.275 | $^2\text{O}$  | $^2\text{O}$  | $^2\text{O}$  |
| 0.300 | $^2\text{O}$  | $^2\text{O}$  | $^2\text{O}$  |
| 0.325 | $^2\text{Mg}$ | $^2\text{Mg}$ | $^2\text{Mg}$ |
| 0.350 | $^2\text{Mg}$ | $^2\text{Mg}$ | $^2\text{Mg}$ |
| 0.375 | $^2\text{Mg}$ | $^2\text{Mg}$ | $^2\text{Mg}$ |
| 0.400 | $^2\text{Mg}$ | $^2\text{Mg}$ | $^2\text{Mg}$ |
| 0.425 | $^2\text{Mg}$ | $^2\text{Mg}$ | $^2\text{Mg}$ |
| 0.450 | $^3\text{O}$  | $^3\text{O}$  | $^3\text{O}$  |
| 0.475 | $^3\text{O}$  | $^3\text{O}$  | $^3\text{O}$  |
| 0.500 | $^3\text{O}$  | $^3\text{O}$  | $^3\text{O}$  |

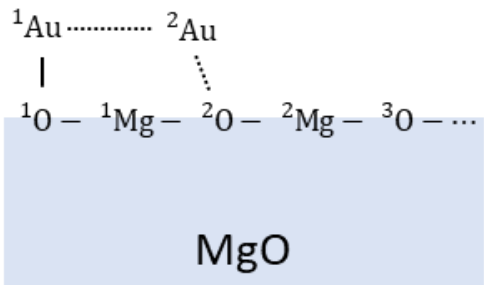

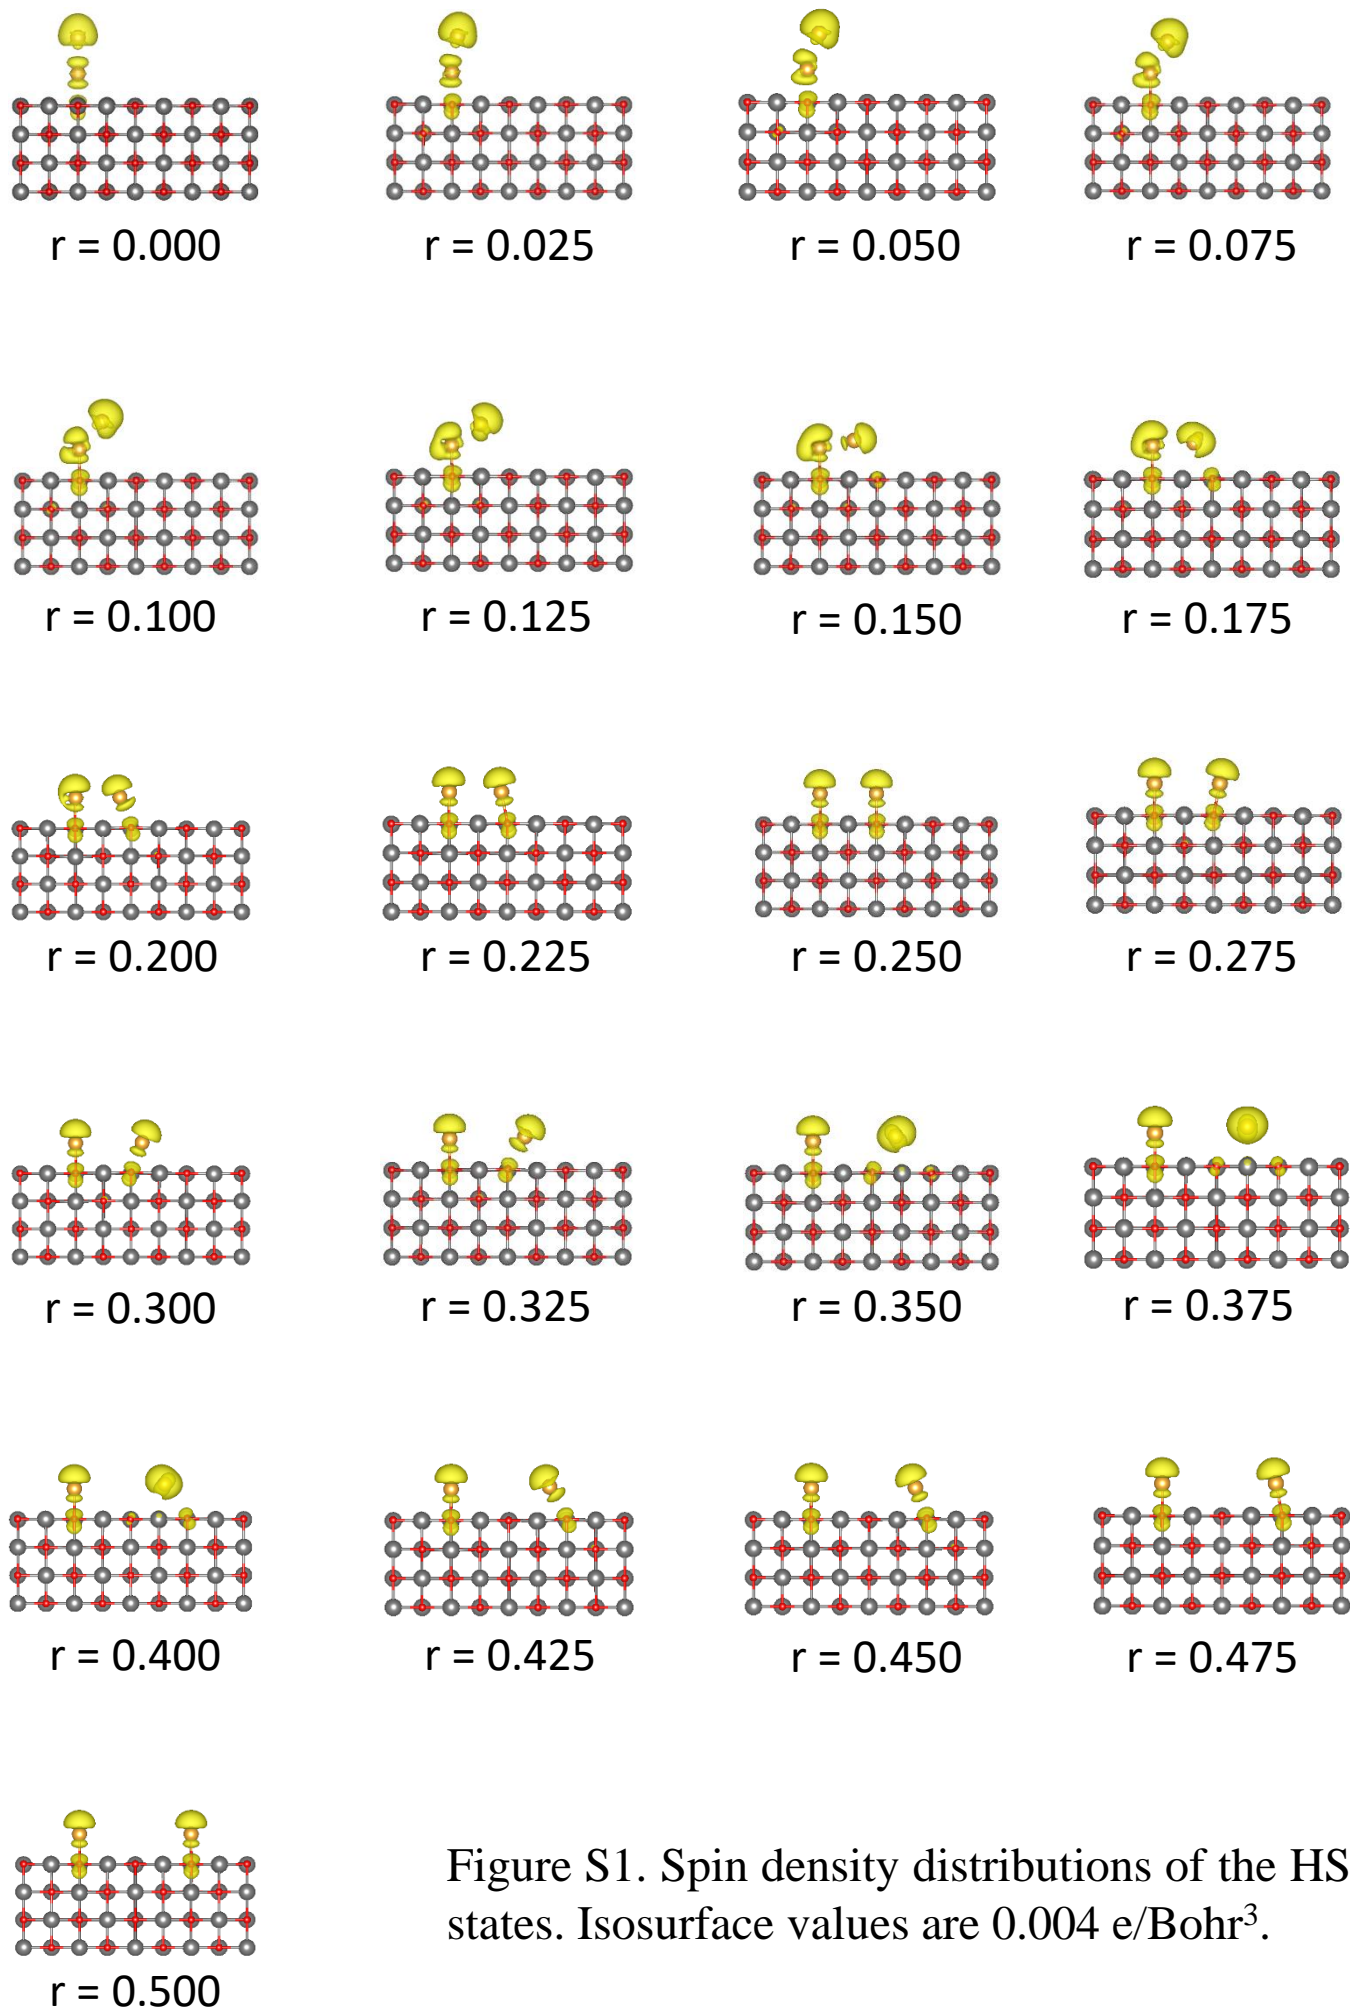

Figure S1. Spin density distributions of the HS states. Isosurface values are 0.004 e/Bohr<sup>3</sup>.
